# Supplementary material for: Thymol-loaded PLGA nanoparticles: an efficient approach for acne treatment
Source: PubMed Central journal article supplement (PMC8577023; doi:10.1186/s12951-021-01092-z), 2021-11-08
Supplement: 12951_2021_1092_MOESM1_ESM.pdf [file 12951_2021_1092_MOESM1_ESM.pdf]

## Additional file 1

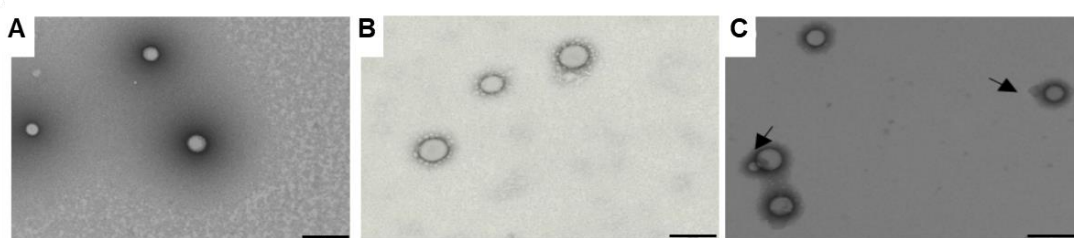

**Figure S1.** Morphology of TH-NP by TEM. **(A)** 1 month at 4 °C **(B)** 1 month at 25 °C and **(C)** 12 months at 4 °C. Arrows indicate aggregation. Scale bar: 200 nm.

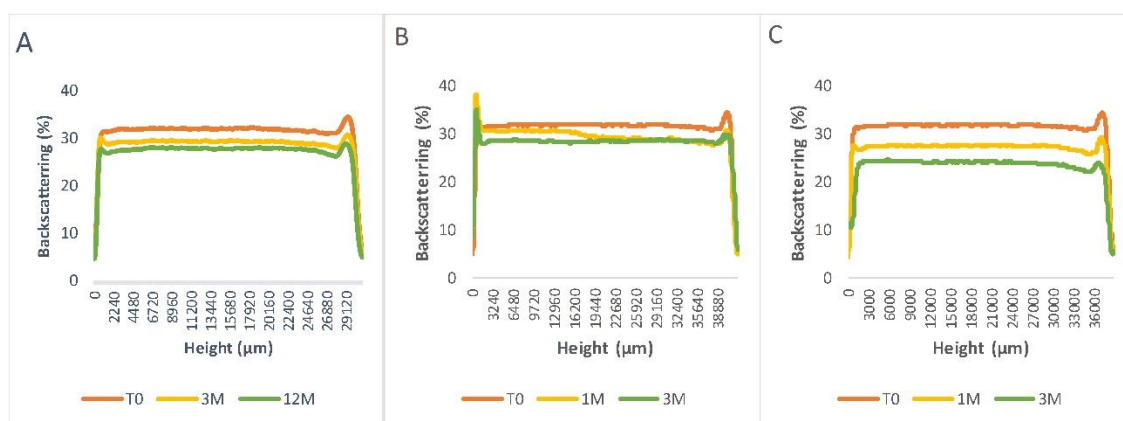

**Figure S2.** Stability behavior of TH-NP plotted as light backscattering (%) vs sample height, at several storage conditions: (A) 4 °C up to 12 m, (B) 25 °C and (C) 37 °C up to 3 months. The scans are shown from the bottom to the top of the vial from the left to the right, as mean values of hourly measurements for 24 h.

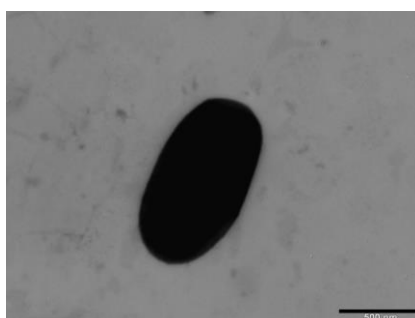

**Figure S3.** Morphology of *C. acnes* observed by TEM after negative staining. Scale bar 500 nm.
